# Supplementary material for: A physical concept in the press: the case of the Jet Stream
Source: Copernicus journal article supplement (doi:10.5194/gc-2021-34), 2021-11-29
Supplement: Supplementary file 1 [file gc-2021-34-supplement.pdf]

**Before today, how much have you heard or read about rising global temperatures?**

- a) Nothing
- b) Little
- c) Quite a lot
- d) A lot

|             |       |        |        |        |
|-------------|-------|--------|--------|--------|
| Answers     | a     | b      | c      | d      |
| Percentages | 1.14% | 15.82% | 56.77% | 26.26% |

**How do you agree with the fact that there is an increase in global temperature?**

- a) Nothing
- b) Little
- c) Quite a lot
- d) A lot
- e) Total

|             |       |       |        |        |        |
|-------------|-------|-------|--------|--------|--------|
| Answers     | a     | b     | c      | d      | e      |
| Percentages | 3.43% | 3.10% | 15.17% | 23.65% | 54.32% |

**How do you agree that the global temperature rise is caused by human activity?**

- a) Nothing
- b) Little
- c) Quite a lot
- d) A lot

|             |       |       |        |        |
|-------------|-------|-------|--------|--------|
| Answers     | a     | b     | c      | d      |
| Percentages | 0.65% | 3.26% | 32.95% | 63.13% |

**What degree of consensus do you think exists in the scientific community on the influence of human activity on the increase in global temperature?**

- a) Nothing
- b) Little
- c) Quite a lot
- d) A lot
- e) Total

|             |         |         |         |        |        |
|-------------|---------|---------|---------|--------|--------|
| Answers     | b       | c       | d       | e      | White  |
| Percentages | 13.87 % | 39.31 % | 36.22 % | 9.95 % | 0.65 % |

**How much knowledge do you think you have about the origin and effects of the current increase in global temperature described by the scientific community?**

- a) Nobody
- b) Little
- c) Quite a lot
- d) A lot
- e) All

| Answers     | a     | b      | c      | d      | White |
|-------------|-------|--------|--------|--------|-------|
| Percentages | 1.79% | 42.58% | 38.17% | 16.48% | 0.98% |

**How important do you think the current rise in global temperature is described by the scientific community?**

- a) None
- b) Little
- c) Quite a lot
- d) A lot
- e) Vital

| Answers     | b      | c       | d       | e       | White  |
|-------------|--------|---------|---------|---------|--------|
| Percentages | 2.45 % | 13.54 % | 29.04 % | 54.49 % | 0.49 % |

**How concerned are you about rising global temperatures?**

- a) Nothing
- b) Little
- c) Quite a lot
- d) A lot
- e) Total

| Answers     | a      | b       | c       | d       | e       |
|-------------|--------|---------|---------|---------|---------|
| Percentages | 1.20 % | 13.05 % | 37.75 % | 34.54 % | 13.45 % |

**What position do you maintain in the face of news related to the increase in global temperature?**

- a) I don't think there is an increase in temperature
- b) I am skeptical, I have doubts
- c) I'm not interested
- d) I think that the change is insufficient to talk about risk
- e) I am concerned

| Answers     | b     | c     | d     | e      | Other |
|-------------|-------|-------|-------|--------|-------|
| Percentages | 4.24% | 3.26% | 8.97% | 83.52% | 0.32  |

**Which of these media do you mainly use to inform yourself about the increase in the global temperature of the Earth?**

- a) Written and digital press
- b) Scientific journals
- c) Books
- d) Classes
- e) Scientific talks
- f) Specialized web pages
- g) Television
- h) Radio

| Answers     | a       | b     | c      | d      | f      | g      |
|-------------|---------|-------|--------|--------|--------|--------|
| Percentages | 53.67 % | 2.28% | 3.59 % | 4.73 % | 9.62 % | 26.10% |

**From which of the following people did you last obtain information about the increase in the Earth's temperature?**

- a) A scientist
- b) A politician
- c) A teacher
- d) A friend
- e) A journalist
- f) A coworker

| Answers     | a      | b     | c      | d      | e      | White |
|-------------|--------|-------|--------|--------|--------|-------|
| Percentages | 16.97% | 2.61% | 27.24% | 10.11% | 41.92% | 1.14% |

**¿ How would you define the information that comes to you about the increase in global temperature?**

- a) Conservative
- b) Realistic
- c) Exaggerated
- d) Catastrophist

|             |        |        |       |        |
|-------------|--------|--------|-------|--------|
| Answers     | a      | b      | c     | d      |
| Percentages | 21.86% | 58.89% | 7.50% | 11.75% |

**How do you define yourself politically?**

- a) Center
- b) Progressive (Left)
- c) Conservative (Right)
- d) Liberal

|             |        |        |       |        |       |
|-------------|--------|--------|-------|--------|-------|
| Answers     | a      | b      | c     | d      | White |
| Percentages | 19.09% | 55.95% | 5.38% | 13.05% | 6.53% |

**The rise in global average temperature is a major threat to**

- a) The earth
- b) Living beings

|             |        |        |       |
|-------------|--------|--------|-------|
| Answers     | a      | b      | Other |
| Percentages | 40,13% | 57,10% | 2,77% |

**To what responds mainly according to you the changes that are taking place mainly and at the moment in the global temperature?**

- a) Natural changes in the Earth's orbit around the Sun
- b) Human activity
- c) The cycles of the Sun
- d) A combination of the three previous options in equal parts.

|             |        |        |       |
|-------------|--------|--------|-------|
| Answers     | b      | d      | Other |
| Percentages | 77.49% | 18.43% | 4.08% |

**What terminology best defines the current increase in Earth's global temperature?**

- a) Climate change
- b) Global Warming
- c) Natural change

|             |        |        |       |
|-------------|--------|--------|-------|
| Answers     | a      | b      | Other |
| Percentages | 30.18% | 67.37% | 2.44% |

**Which physical phenomenon do you think is most responsible for the current rise in global temperature?**

- a) Variations in solar radiation reaching the Earth.
- b) The greenhouse effect
- c) The hole in the ozone layer
- d) Air pollution.
- e) Hole in the atmosphere

|             |       |        |        |        |       |
|-------------|-------|--------|--------|--------|-------|
| Answers     | a     | b      | c      | d      | Other |
| Percentages | 3.92% | 58.08% | 15.17% | 18.60% | 4.25% |

**Which of these gases is the main responsible for the current rise in global temperature?**

- a) Carbon dioxide (CO<sub>2</sub>)
- b) Ozone (O<sub>3</sub>)
- c) Methane (CH<sub>4</sub>)
- d) Nitrogen dioxide (NO<sub>2</sub>)

|             |        |       |        |       |       |
|-------------|--------|-------|--------|-------|-------|
| Answers     | a      | b     | c      | d     | White |
| Percentages | 78.96% | 4.73% | 11.09% | 2.45% | 2.77% |

**Carbon dioxide (CO<sub>2</sub>) is a gas that**

- a) Directly heat the surface
- b) Directly cools the surface
- c) Blocks the heat emitted by the Earth to the space
- d) Reduces ozone concentration
- e) I do not have enough knowledge to answer

|             |       |        |       |        |       |
|-------------|-------|--------|-------|--------|-------|
| Answers     | a     | c      | d     | e      | Other |
| Percentages | 7.34% | 55.79% | 9.46% | 24.96% | 2.45% |

**Why does cutting down forests affect the Earth's climate?**

- a) Because trees clean the air, reducing pollution
- b) Because forests shelter a multitude of other animals and are fundamental to the ecosystem
- c) Because forests regulate the water and carbon cycle

|             |        |       |        |       |
|-------------|--------|-------|--------|-------|
| Answers     | a      | b     | c      | Other |
| Percentages | 49.59% | 8.48% | 37.36% | 4.57% |

**Why does burning oil (gasoline, diesel, natural gas, etc.) or coal as fuel for cars, heating or producing electricity affect the Earth's climate, heating it up?**

- a) Because it is done on such a large scale that the heating of the air is too strong.
- b) Because the air is saturated with pollution.
- c) Because a lot of carbon dioxide that was stored underground is added to the atmosphere, intensifying the greenhouse effect.
- d) Because it affects the ozone layer, destroying it.

|             |       |        |        |        |       |
|-------------|-------|--------|--------|--------|-------|
| Answers     | a     | b      | c      | d      | Other |
| Percentages | 5.55% | 12.40% | 59.87% | 19.41% | 2.78% |

**The greenhouse effect**

- a) It is a process that already existed before human beings
- b) Appears as a consequence of human activity

|             |        |        |       |
|-------------|--------|--------|-------|
| Respuestas  | a      | b      | Other |
| Porcentajes | 57.10% | 41.44% | 1.14% |

**With the increase in global temperature there is a warming of**

- a) the atmosphere
- b) The surface
- c) The oceans
- d) The surface and the oceans
- e) The a, b and c are correct

|             |       |       |        |        |       |
|-------------|-------|-------|--------|--------|-------|
| Answers     | a     | c     | d      | e      | Other |
| Percentages | 5.55% | 3.10% | 11.58% | 77.49% | 2.28% |

**What is the average global temperature of the planet today?**

- a) 30 degrees
- b) 25 degrees
- c) 15 degrees
- d) 10 degrees

|             |       |        |        |       |       |
|-------------|-------|--------|--------|-------|-------|
| Answers     | a     | b      | c      | d     | Other |
| Percentages | 3.92% | 41.44% | 50.24% | 2.45% | 1.95% |

**What do you think the global average temperature was during the last ice age?**

- a) 10 degrees
- b) 0 degrees
- c) -10 degrees
- d) -100 degrees

|             |        |        |        |        |       |
|-------------|--------|--------|--------|--------|-------|
| Answers     | a      | b      | c      | d      | White |
| Percentages | 19.90% | 15.82% | 48.12% | 13.87% | 2.28% |

**What describes the state of the atmosphere at a specific time and place?**

- a) Weather
- b) Climate

c) Both are correct

|             |        |        |        |       |
|-------------|--------|--------|--------|-------|
| Answers     | a      | b      | c      | White |
| Percentages | 36.38% | 19.90% | 42.25% | 1.47% |

**The possibility that a winter could be colder and rainier than normal in a context of increasing global temperature is**

- a) Not likely
- b) Unlikely
- c) Quite likely
- d) Very likely

|             |        |        |        |       |
|-------------|--------|--------|--------|-------|
| Answers     | a      | b      | c      | d     |
| Percentages | 26.75% | 47.47% | 21.53% | 4.24% |

**What phenomenon causes the current sea level rise?**

- a) The thermal expansion of the oceans
- b) The thaw of Antarctica and Arctic
- e) Changes in ocean currents.

|             |       |        |       |
|-------------|-------|--------|-------|
| Ansíes      | a     | b      | c     |
| Percentages | 3.43% | 93.31% | 3.26% |

**Before today, how much have you heard or read about ocean acidification?**

- a) Nothing
- b) Little
- c) Quite a lot
- d) A lot

|             |        |        |        |        |       |
|-------------|--------|--------|--------|--------|-------|
| Ansíes      | a      | b      | c      | d      | Other |
| Percentages | 40.78% | 45.03% | 47.47% | 11.42% | 2.77% |



**Do you think that human beings will be able to solve the climate crisis?**

a) Surely not

c) Surely yes

b) Probably not

d) Probably yes

| Answers     | a     | b      | c      | d      |
|-------------|-------|--------|--------|--------|
| Percentages | 7.83% | 59.71% | 10.28% | 22.19% |
