# Supplementary material for: A physical concept in the press: the case of the Jet Stream
Source: Copernicus journal article supplement (doi:10.5194/gc-2021-34), 2021-11-29
Supplement: Supplementary file [file gc-2021-34-AC4-supplement.pdf]

Responses to reviewer 3 (Denise Balmer)

Thank you very much for taking the time to review the article. Please find below the point-by-point responses to your comments:

**Line 25-32 contains a very long sentence which really needs a break**

Indeed. We have broken the long sentence into two smaller ones.

“During this time, the scientific community has published several articles highlighting the urgency of the current situation (National Academy of Science, 2020), while pointing out that the progressive increase of greenhouse gases may trigger a domino effect in the global climate system that would make it unstable. The consequence would be a raising of the Earth’s average temperature beyond the limits established by the Paris Agreement, which aims to prevent the increase in the average global temperature of the planet from exceeding 2°C compared with pre-industrial levels”

**Line 38 phrase is repeated**

The repeated phrase has been deleted.

**Line 47 double full stops**

Corrected. Thank you

**Line 175 an extra ‘i’ needs removing.**

See response below

**Line 176 no need for ‘is’**

See response below

**Line 181 part of the sentence appears to be missing**

See response below

**Line 181 analyse (d)**

There were several grammatical issues in the paragraph in the Methodology section the reviewer is referring to in the last four comments. We have now rewritten it as follows:

“In order to assess the scarce scientific information available to the public on climate change as well as the importance of mass media, we will use the data gathered in a survey on climate change knowledge carried out in Galicia, a region located in the northwest of the Iberian Peninsula. The average annual temperature there increased by 0.20 degrees per decade between 1961 and 2015. Between 1951 and 2017 there were nine episodes of drought. The absence of rain has a very important impact on this Spanish region because its economy and way of life depend on rainfall, which is usually very reliable. It is also the region of the entire Iberian Peninsula with the most kilometers of coastline and this makes it especially vulnerable to rising sea levels (Xunta de Galicia, 2015).

The quantitative study was conducted during the 2018-2019 academic year in the three universities based in Galicia: University of Vigo (UVigo), University of Santiago de Compostela

(USC) and University of A Coruña (UDC). The participants in the survey were 600 students from different years and from both science and humanities fields: Journalism, Sociology, Biology, Political Science, Mathematics, Industrial Engineering, Aeronautical Engineering, Economics and Law. For the statistical analysis, we used the Wilcoxon test and the Kruskal-Wallis test, to identify the factors that have a significant influence on their knowledge on climate change.”

**Line 230 ‘an’ experience**

Corrected

**Line 236 it allows (opportunities?)**

The suggested change has been made.

**Line 276 I ?**

The typo has been corrected

**Line 470....so that the public can piece together each part of the complex puzzle that forms the Earth’s climate....**

The suggested change has been made. Thank you!
